# Supplementary material for: Identifying the effects of new technologies for extreme flood adaptation in China
Source: Research Square preprint supplement (doi:10.21203/rs.3.rs-6566767/v1), 2025-05-13
Supplement: Supplementary file 1 [file 573a8184fd718022607bee5a.docx]

Supplemental Information for:

**Identifying the effects of new technologies for extreme flood adaptation in China**

Table of contents of the Supplemental Information：

[**Text.S1 Data retrieval and pre-processing** 3](#_Toc188303560)

[**Text.S2 Flood Loss Perception Dictionary for multiple sectoral classification** 3](#_Toc188303561)

[**Text.S3 LDA modelling** 4](#_Toc188303562)

[**Text.S4 Mode decomposition of flood loss perception index** 5](#_Toc188303563)

[**Text.S5 Discount factor transformation for precipitation data** 6](#_Toc188303564)

[**Text.S6 Mathematical background in structural equation modeling** 7](#_Toc188303565)

[**Table.S1 Precipitation observatory information of Zhengzhou and its area through the Tyson polygon** 8](#_Toc188303566)

[**Table.S2 Precipitation observatory information of Xinxiang and its area through the Tyson polygon** 8](#_Toc188303567)

[**Table.S3 Multisectoral Flood Loss Perception Dictionaries** 9](#_Toc188303568)

[**Table.S4 Terms related to five sectors** 10](#_Toc188303569)

[**Table.S5 Granger causality test of Flood Loss Perception and maximum rainfall** 11](#_Toc188303570)

[**Table.S6 Results of structural equation model for casualty loss perception (CA1)** 12](#_Toc188303571)

[**Table.S7 Results of structural equation model for communication perception（C1）** 13](#_Toc188303572)

[**Table.S8 Results of structural equation model for water and electricity supply perception (WE1)** 14](#_Toc188303573)

[**Table.S9 Results of structural equation model for transport perception (T1)** 15](#_Toc188303574)

[**Table.S10 Results of structural equation model for building perception (B1)** 16](#_Toc188303575)

[**Table.S11 Ranking the top 30 LSD topic word by weight** 17](#_Toc188303576)

[**Table.S12 Ranking the top 30 UAV topic word by weight** 18](#_Toc188303577)

[**Table.S13 Ranking the top 30 AMap topic word by weight** 19](#_Toc188303578)

[**Table.S14 Ranking the top 30 DW topic word by weight** 20](#_Toc188303579)

[**Table.S15 Ranking the top 30 BS topic word by weight** 21](#_Toc188303580)

[**Table.S16 Ranking the top 30 MC topic word by weight** 22](#_Toc188303581)

[**Table.S17 Ranking the top 30 MP topic word by weight** 23](#_Toc188303582)

[**Table.S18 Description of symbols and formulas** 24](#_Toc188303583)

[**Table.S19 Interpretation of the statistics used** 25](#_Toc188303584)

[**Statistics** 25](#_Toc188303585)

[**Table.S20 Performance of text classification model** 26](#_Toc188303586)

[**Figure.S1 Max rainfall indicator** 26](#_Toc188303587)

[**Figure.S2 The proportion of the four most popular technology strategies discussed on the Weibo platform** 27](#_Toc188303588)

[**Figure.S3 Land use in Henan Province** 28](#_Toc188303589)

[**Figure.S4 The Wing Loong UAV** 28](#_Toc188303590)

[**Figure.S5 Life-saving documents** 29](#_Toc188303591)

[**Figure.S6 The "Dragon Water" drainage device (DW)** 30](#_Toc188303592)

[**Figure.S7 AMap** 31](#_Toc188303593)

[**Figure.S8 Comparison of multiple path models for casualty loss perception** 32](#_Toc188303594)

[**Figure.S9 Comparison of multiple path models for transport loss perception** 33](#_Toc188303595)

[**Figure.S10 Comparison of multiple path models for communication loss perception** 34](#_Toc188303596)

[**Figure.S11 Comparison of multiple path models for water and electricity supply loss perception** 35](#_Toc188303597)

[**Figure.S12 Comparison of multiple path models for building loss perception** 36](#_Toc188303598)

**Text.S1 Data retrieval and pre-processing**

We collected Weibo data sets with hourly rainfall data in this study. Weibo is one of most popular social platforms in China. We collected all the microblogs from July 10, 2021 to August 10, 2021 that were simultaneously related to two key words, “Henan” and “flood”. According to users with IP addresses in Henan Province, a total of 3586895 posts were posted during the flood in Henan. Weibo data set consists of three fields, release time, user name and published content. Release time is the exact time a user posts information to Weibo platform, and it is accurate to minute-level. The three steps of data preprocessing are as follows:

**Step 1:** Data cleaning. Specifically, in terms of the first sub-step, the valuable microblogs were retained by removing the irrelevant microblogs (such as high-frequency words and non-Chinese language review) among the collected microblogs. Meanwhile, reviews that were repeated within a short period of time are deleted.

**Step 2:** Tokenization and removing stop words. Next, an effective Python program based on Jieba toolkit , an extensively used Chinese word tokenization tool, is developed for segmenting the review words. And then, we removed the stop words that provided limited review information.

**Step 3:** We filtered the Weibo dataset for words related to technical tools during the Henan flood disaster, including life-saving documents (救命文档), Dragon Water (龙吸水), lifesaving robot (救生机器人), UAV (无人机), AMap (高德地图), Smart Water (智慧水务), and other emerging technologies. The frequency of these words was extracted and counted on an hourly basis to create the emerging technology index. Using this index, we specifically extracted the emerging technology-related microblog dataset (Tech dataset) from the original Weibo dataset. The Tech dataset, consisting of 9,629 microblogs, reflects the public's perception and evaluation of emerging technologies during the Henan flooding, providing insight into the effectiveness of these technologies from a public perspective. Similarly, we utilized multisectoral terms (see Appendix Table.1) to extract a microblogging dataset that captures flood perceptions across multiple sectors.

**Text.S2 Flood Loss Perception Dictionary for multiple sectoral classification**

Urban flooding leads to severe damages that affect all aspects of the urban system1. We classified the Weibo data used in this study into six sectoral datasets based on related sectoral words. Appendix Table 1 presents the specific sectoral words and the size of each corresponding dataset after classification.

The flood perception dictionary was constructed based on the following process (refer to the Appendix for the flood perception dictionary). Next, we will process the microblog data of various topics, divided by the aforementioned steps, as indicated in Figure 2.


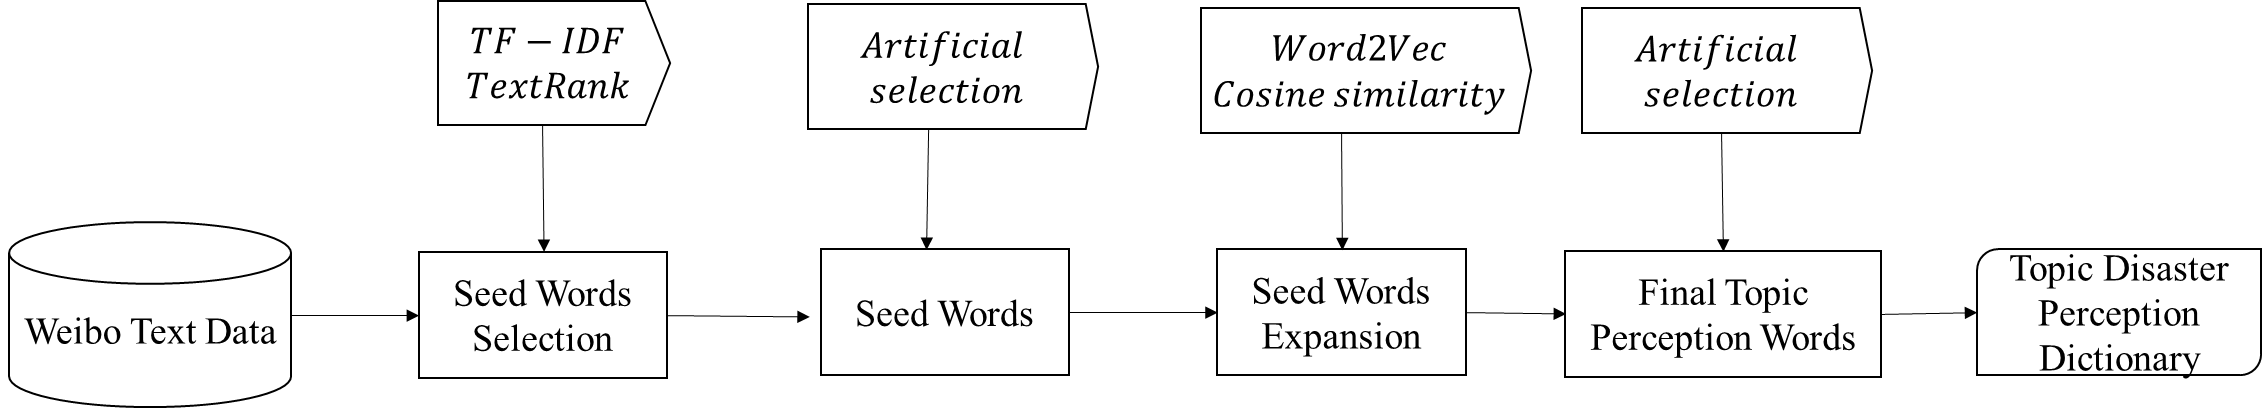


**Fig. 2 Flood awareness dictionary construction processes for multiple sectoral**

**Step 1:** The initial screening of seed words involves a keyword extraction algorithm that utilizes TF-IDF (Term Frequency-Inverse Document Frequency)2 and TextRank3 for the microblog data of relevant topics. TF-IDF is a method used to measure the significance of a word in a specific document collection or corpus. It is defined as:

Where, is the original frequency of term in document d, N is the total number of documents in the corpus, and is the total number of documents containing term appearing at least once.

TextRank algorithm considers each word in the microblog text as a graph point and sorts them based on a voting principle. The resulting weighted directed graph G includes every word, which constitutes point set V, and edges represented by the co-occurrence relationship between words that form edge set E. The edge weight is denoted as w. In addition, In(V) represents a set of other points that point to point V, and Out(V) represents a set of points that point from point V to other points. TextRank is calculated using the following formula:

Where, is the damping coefficient, which represents the probability of pointing from one point in the graph to any other point, normally is 0.85.

**Step 2:** the preliminary screening results were manually screened, mainly to remove some obviously unreasonable words.

**Step 3:** We used Word2Vec(38, 39) to represent and map each word in the microblog text into a corresponding word vector.4, 5. Word2Vec is a shallow neural network-based computational tool for generating word vectors. It can efficiently compute word vectors on a large dataset, and the similarity between words can be accurately measured by calculating cosine similarity between their corresponding word vectors.

where is the serial number of the word, is a word, I is word vector of i-word, J is word vector of j-word.

Following this, we expanded upon the seed words using word vector cosine similarity and selected the top 100 words with the highest similarity scores. We then conducted a secondary manual screening process to eliminate irrelevant words and obtained the final flood disaster perception dictionary for specific sectors. This procedure was repeated for each of the six sectors' microblog data to develop their respective perception dictionaries.

**Text.S3 LDA modelling**

The LDA model works on the assumption that each comment is a combination of different topics and that each topic has a probability distribution for different words used in the comment. To elaborate further, each comment is treated as a multinomial distribution θ(c) of the topic T, with each topic , j=1, 2, …t. A multinomial distribution ϕ(j) over a set of words is assumed. To uncover the existing topics from the microblog corpus, and the distribution of these topics within each comment, it is necessary to estimate the values of θ and ϕ. Generally, it is challenging to calculate various distributions and exact extrapolations of word probabilities for each topic in this model. In this study, we utilized Gibbs sampling, which is a widely-used method for approximate reasoning, to estimate these distributions 2, 6.

**Text.S4 Mode decomposition of flood loss perception index**

From a temporal perspective, both the flood perception index and emerging technology index, derived from microblog comments, exhibit day-night periodicity. People tend to post more microblogs during the day than at night when they are asleep, resulting in a regular signal fluctuation caused by the day-night cycle.

To investigate the relation between emerging technology and disaster recovery, we employed the Variational mode decomposition (VMD)7 technique to decompose time series of the emerging technology index and the flood disaster perception index into high frequency and low frequency signals. The high-frequency signals primarily reflect the trend influenced by day and night, while the low-frequency signals primarily reflect the main trend influenced by heavy rain events.

Dragomiretskiy and Zosso introduced the Variational Mode Decomposition (VMD) as a new, multi-resolution technique for non-recursive signal processing in 2014. VMD employs adaptive decomposition of real-valued signals (f(t)) into a discrete number of Basis Intrinsic Mode Functions (BIMF). Each BIMF () is centred around a pulsation () that is determined during the decomposition process. The bandwidth of each BIMF is estimated using the Gaussian smoothness function (H1) of the shifted signal, with the method implementing constrained variational problem-solving, as shown in Equation 1.

The introduction of augmented Lagrangian multipliers (λ) transforms the aforementioned constrained optimization problem for VMD into an unconstrained problem. Equation (2) illustrates the augmented Lagrangian multiplier, where the balancing parameter of the data-fidelity constraint is represented by α.

The optimal solutions for ,and λ are settled using the Alternate Direction Method of Multipliers (ADMM), which is written as:

where , , and represent the Fourier transforms of , and n is the number of iterations. The complete processes if VMD are explained as followed:

(a) Initialize the{ˆm1k},{ˆw1k},ˆλ1and n, where n=0;

(b) update the , and λ according to the formulas(3)-(5)

(c) Given a threshold ε, if the condition is met:, stop the iteration else repeat step 2 to 5.

**Text.S5 Discount factor transformation for precipitation data**

The adoption of emerging technologies during flooding disaster has an immediate impact on urban flood mitigation, but their effect diminishes over time. To capture this concept, a discount factor8, 9 was introduced to adjust the time series of the emerging technology index. The discount factor represents the current share equivalent to one past or future share, and typically ranges between 0 and 1. In this study, a discount factor of 0.8 was used.

The lasting impact of rainfall and emerging technologies during flood disaster relief is accounted for by discounting the past share of each to its present value. This process involves adjusting the value of past shares to current values to accurately reflect their current impact on urban flood mitigation. Since the maximum lag order between flood perception and rainfall is 6, we determine the value of p to be 6 in this work.

**Text.S6** **Mathematical background in structural equation modeling**

Structural equation modeling (SEM) is a multivariate statistical technique that integrates factor analysis and path analysis, which is suitable for quantitative research on the interaction between multiple variables. The basic structural equation model is divided into two parts: measurement equation and structural equation. The measurement equation is used to express the relationship between the latent variables and the observed indicators, and the structural equation is used to express the relationship between the potential endogenous variables and the potential exogenous variables.

1. Measurement equation

The measurement equation is a confirmatory factor analysis model used to link latent variables with their corresponding observable variables (explicit indicators), and to account for measurement error, this part can be viewed as a regression model by the regression of observable variables on a small number of latent variables. The measurement equation is shown below

Here, is the dimension observable random vector, is dimension Factor loading matrix, is latent variable, where is the potential dependent variable and is the potential independent variable, is the error difference term independent of . Suppose follows the N [0, Ψε] distribution and Ψε is a diagonal matrix.

1. Structural equation

A structural equation is a regressive structural equation in which the endogenous latent variables are regressed on the linear terms of a number of endogenous and exogenous latent variables. The structural equation is as follows:

Here, ∏ (q1 ×q1) and Γ (q1 ×q2) are the matrix of unknown regression coefficients, δi is the q1 ×1 error term. Suppose that it follows the N [0, Φ] distribution and δi follows the N [0, Ψδ] distribution, where Ψδ is a diagonal matrix and is independent of δi.

In this paper, we use the Diagonally Weighted Least Squares(DWLS)10 method to estimate the structural equation model based on the establishment of the sample covariance matrix S.

**Table.S1 Precipitation observatory information of Zhengzhou and its area through the Tyson polygon**

| Station number | longitude | latitude | District (county) | area | Tyson area ratio |
| --- | --- | --- | --- | --- | --- |
| 57084 | 113.05 | 34.5 | Songshan | 462.8875995 | 0.061557 |
| 57080 | 112.97 | 34.73 | Gongyi | 777.08164 | 0.103341 |
| 57082 | 113.02 | 34.47 | Dengfeng | 811.4508506 | 0.107911 |
| 57081 | 113.43 | 34.8 | Xingyang | 1021.602965 | 0.135858 |
| 57083 | 113.65 | 34.72 | Zhengzhou | 1013.869432 | 0.13483 |
| 57085 | 113.33 | 34.53 | Xinmi | 1059.550678 | 0.140905 |
| 57086 | 113.72 | 34.38 | Xinzheng | 913.6703192 | 0.121505 |
| 57090 | 113.97 | 34.72 | Zhongmou | 1459.502744 | 0.194093 |

**Table.S2 Precipitation observatory information of Xinxiang and its area through the Tyson polygon**

| Station number | longitude | latitude | District (county) | area | Tyson area ratio |
| --- | --- | --- | --- | --- | --- |
| 53994 | 114.07 | 35.38 | Weihui | 958.7253907 | 0.115794 |
| 53986 | 113.88 | 35.32 | Xinxiang | 477.8357608 | 0.057713 |
| 53988 | 113.67 | 35.27 | Huojia | 1274.942924 | 0.153986 |
| 53997 | 114.18 | 35.15 | Yanjin | 892.7160325 | 0.107821 |
| 53989 | 113.98 | 35.08 | Yuanyang | 992.7955328 | 0.119909 |
| 53983 | 114.42 | 35.03 | Fengqiu | 899.4273955 | 0.108632 |
| 53985 | 113.82 | 35.5 | Huixian | 1434.325462 | 0.173236 |
| 53998 | 114.65 | 35.2 | Changyuan | 1348.812279 | 0.162908 |

**Table.S3 Multisectoral Flood Loss Perception Dictionaries**

| Dict Name | Dict Content |
| --- | --- |
| Transport  perception dictionary | '瘫痪','湿滑','积水','堵塞','封闭','预警','中断','不便','事故','断行','瘫痪','淹','失望','受阻','停运','拥堵','趟水','被困','停','打不到车','堵','过不去','不畅','进水','塌方','塌','落石','延误','灌水','中断','拥挤','阻碍','缓慢','倒灌','进退两难','停滞','封','被封','揪心','担忧','停摆','塌陷','不好','隔绝','不稳定','不畅通','时有时无','问题','故障','时好时坏','微弱' ,'满目疮痍','混乱','被淹','交通拥堵','交通不便','坍塌','淹没','受损','受灾','崩溃','封闭','毁','被淹' |
| Building  perception dictionary | '倒塌','坍塌', '被淹', '冲毁', '受损','冲断','塌陷','损坏', '损毁','冲垮','冲塌', '裂开', '危房', '要塌','尽毁','摧毁','晃动','垮塌', '倾倒','巨大损失','破损','震塌','断裂','毁损','沉陷','塌掉','泡坏','塌陷','冲塌','泡坏','震塌','震动','被砸','砸断','砸伤','震碎','被淹','漏水','保不住','冲没','被刮','塌','倒塌','被埋','坍塌','渗水','倒塌','冲塌','塌了','泡塌', '淹没','夷为平地','开裂' |
| Water and electricity supply perception dictionary | '切断','停了','停','裂开','全停','不通','没有','中断','失联','已断','缺少','影响','断了','断掉','切断','停水','停电','断水','断电','停','没来','不通' |
| Communication perception dictionary | '断','失联','无网络','无通信','中断','信号太差','困难','险情','瘫痪','被困','远古时代','退服','受损','差','极差','阻断','失去','无服务','打不出去','弱','无法','影响','异常','断掉','时断时续','停','太差','间断','没有','没','反反复复','断断续续','不好','停摆','槽糕','暴力','发不出来','无','较差','不行' |
| Casualty  perception  dictionary | '遇难','人员伤亡','伤亡','伤亡惨重','过高','伤亡人数','不计其数','惨重','失踪','魂灵','流离失所','受伤' |

**Table.S4 Terms related to five sectors**

| Several thematic  data sets | Several topic classification method |
| --- | --- |
| Traffic | “交通”(“traffic”)，公路(“highway”)，地铁(“subway”)，公交(“bus”)，运输(“transport”) |
| Water and electricity | 水（waster），电(electricity) |
| Communication | 通讯(communication)，网络(network)，信号(signal)，光缆(cable) |
| Casualties | 受伤(injured)，死亡(death)，伤亡(casualties)，遇难(killed) |
| Building | 建筑(building)，房屋(housing)，房子(house) |

**Table.S5 Granger causality test of Flood Loss Perception and maximum rainfall**

| **Lag order** | **FLP** | **CMLP** | **CALP** | **TRLP** | **BDLP** | **WELP** |
| --- | --- | --- | --- | --- | --- | --- |
| **1** | 2.374  (0.124) | 0.782  (0.377) | 0.496  (0.481) | 0.927  (0.336) | 3.391  (0.066) | 8.299  (0.004) |
| **2** | 2.987  (0.051) | 19.281  (0.000) | 0.238  (0.787) | 0.473  (0.623) | 3.642  (0.027) | 4.000  (0.019) |
| **3** | 3.157  (0.025) | 12.091  (0.000) | 0.225  (0.878) | 0.356  (0.784) | 4.479  (0.004) | 9.212  (0.000) |
| **4** | 3.021  (0.018) | 8.027  (0.000) | 3.407  (0.009) | 0.504  (0.732) | 2.904  (0.022) | 11.277  (0.000) |
| **5** | 2.416  (0.036) | 6.314  (0.000) | 3.496  (0.004) | 1.012  (0.410) | 2.281  (0.046) | 8.882  (0.000) |
| **6** | 6.796  (0.000) | 5.434  (0.000) | 8.252  (0.000) | 3.655  (0.001) | 2.744  (0.013) | 15.161  (0.000) |
| **7** | 7.006  (0.000) | 5.175  (0.000) | 9.405  (0.000) | 3.511  (0.001) | 2.273  (0.028) | 15.354  (0.000) |

Note: The F test value is shown in the table, and the corresponding p value is shown in parentheses. The lag order between the loss index of different industries and the maximum rainfall is different.

**Table.S6 Results of structural equation model for casualty loss perception (CA1)**

| lval | op | rval | Estimate | Std. Err | z-value | p-value |
| --- | --- | --- | --- | --- | --- | --- |
| REE | ~ | UAV | 0.078112 | 0.043703 | 1.787334 | 7.388354e-02 |
| REE | ~ | Rain | -0.114023 | 0.041453 | -2.750628 | 5.948112e-03 |
| REE | ~ | LSD | 0.577588 | 0.039721 | 14.541164 | 0.000000e+00 |
| LSD | ~ | UAV | 0.309267 | 0.062219 | 4.970583 | 6.675172e-07 |
| LSD | ~ | Rain | 0.661908 | 0.047544 | 13.921875 | 0.000000e+00 |
| d_CALP | ~ | UAV | -0.364807 | 0.046905 | -7.777603 | 7.327472e-15 |
| d_CALP | ~ | Rain | 0.708172 | 0.044823 | 15.799347 | 0.000000e+00 |
| d_CALP | ~ | LSD | -0.302967 | 0.055831 | -5.426501 | 5.746936e-08 |
| d_CALP | ~ | REE | -0.192869 | 0.062894 | -3.066549 | 2.165454e-03 |
| REE | ~~ | REE | 0.540090 | 0.045008 | 12.000000 | 0.000000e+00 |
| LSD | ~~ | LSD | 1.188600 | 0.099050 | 12.000000 | 0.000000e+00 |
| d_CALP | ~~ | d_CALP | 0.615294 | 0.051275 | 12.000000 | 0.000000e+00 |

Note: ∼ to specify structural part, =∼ to specify measurement part, ∼∼ to specify common variance between variables.

**Table.S7** **Results of structural equation model for communication perception（C1）**

| lval | op | rval | Estimate | Std. Err | z-value | p-value |
| --- | --- | --- | --- | --- | --- | --- |
| REE | ~ | UAV | 0.078264 | 0.043709 | 1.790557 | 7.336438e-02 |
| REE | ~ | Rain | -0.114280 | 0.041463 | -2.756194 | 5.847823e-03 |
| REE | ~ | LSD | 0.577762 | 0.039730 | 14.542099 | 0.000000e+00 |
| LSD | ~ | UAV | 0.308821 | 0.062220 | 4.963334 | 6.929336e-07 |
| LSD | ~ | Rain | 0.661888 | 0.047545 | 13.921253 | 0.000000e+00 |
| d_CMLP | ~ | UAV | -0.608689 | 0.045401 | -13.406894 | 0.000000e+00 |
| d_CMLP | ~ | Rain | 0.740413 | 0.043392 | 17.063524 | 0.000000e+00 |
| d_CMLP | ~ | LSD | -0.099499 | 0.054047 | -1.840977 | 6.562486e-02 |
| d_CMLP | ~ | REE | -0.203238 | 0.060869 | -3.338969 | 8.408982e-04 |
| LSD | ~~ | LSD | 1.188635 | 0.099053 | 12.000000 | 0.000000e+00 |
| REE | ~~ | REE | 0.540362 | 0.045030 | 12.000000 | 0.000000e+00 |
| d_CMLP | ~~ | d_CMLP | 0.576587 | 0.048049 | 12.000000 | 0.000000e+00 |

Note: ∼ to specify structural part, =∼ to specify measurement part, ∼∼ to specify common variance between variables.

**Table.S8 Results of structural equation model for water and electricity supply perception (WE1)**

| lval | op | rval | Estimate | Std. Err | z-value | p-value |
| --- | --- | --- | --- | --- | --- | --- |
| REE | ~ | UAV | 0.078064 | 0.043702 | 1.786264 | 7.405651e-02 |
| REE | ~ | Rain | -0.114275 | 0.041460 | -2.756254 | 5.846766e-03 |
| REE | ~ | LSD | 0.577635 | 0.039729 | 14.539243 | 0.000000e+00 |
| LSD | ~ | UAV | 0.308740 | 0.062213 | 4.962648 | 6.953860e-07 |
| LSD | ~ | Rain | 0.661938 | 0.047539 | 13.924042 | 0.000000e+00 |
| d_WELP | ~ | UAV | -0.470869 | 0.047908 | -9.828584 | 0.000000e+00 |
| d_WELP | ~ | Rain | 0.707697 | 0.045793 | 15.454288 | 0.000000e+00 |
| d_WELP | ~ | LSD | -0.169125 | 0.057036 | -2.965247 | 3.024399e-03 |
| d_WELP | ~ | REE | -0.418732 | 0.064241 | -6.518108 | 7.119993e-11 |
| LSD | ~~ | LSD | 1.188341 | 0.099028 | 12.000000 | 0.000000e+00 |
| REE | ~~ | REE | 0.540204 | 0.045017 | 12.000000 | 0.000000e+00 |
| d_WELP | ~~ | d_WELP | 0.642067 | 0.053506 | 12.000000 | 0.000000e+00 |

Note: ∼ to specify structural part, =∼ to specify measurement part, ∼∼ to specify common variance between variables.

**Table.S9 Results of structural equation model for transport perception (T1)**

| lval | op | rval | Estimate | Std. Err | z-value | p-value |
| --- | --- | --- | --- | --- | --- | --- |
| REE | ~ | Rain | 0.187455 | 0.037619 | 4.983028 | 6.259704e-07 |
| REE | ~ | AMap | 0.394036 | 0.045155 | 8.726393 | 0.000000e+00 |
| REE | ~ | DW | 0.061580 | 0.035771 | 1.721534 | 8.515389e-02 |
| AMap | ~ | UAV | 0.775738 | 0.047711 | 16.259260 | 0.000000e+00 |
| AMap | ~ | Rain | 0.246555 | 0.036458 | 6.762810 | 1.353406e-11 |
| d_TRLP | ~ | Rain | 0.523383 | 0.040590 | 12.894261 | 0.000000e+00 |
| d_TRLP | ~ | AMap | -0.176130 | 0.062929 | -2.798859 | 5.128355e-03 |
| d_TRLP | ~ | REE | -0.444827 | 0.055472 | -8.018979 | 1.110223e-15 |
| d_TRLP | ~ | UAV | -0.423984 | 0.066172 | -6.407326 | 1.480940e-10 |
| AMap | ~~ | AMap | 0.698894 | 0.058241 | 12.000000 | 0.000000e+00 |
| REE | ~~ | REE | 0.782913 | 0.065243 | 12.000000 | 0.000000e+00 |
| d_TRLP | ~~ | d_TRLP | 0.700924 | 0.058410 | 12.000000 | 0.000000e+00 |

Note: ∼ to specify structural part, =∼ to specify measurement part, ∼∼ to specify common variance between variables.

**Table.S10** **Results of structural equation model for building perception (B1)**

| lval | op | rval | Estimate | Std. Err | z-value | p-value |
| --- | --- | --- | --- | --- | --- | --- |
| REE | ~ | UAV | 0.245713 | 0.055214 | 4.450216 | 8.578398e-06 |
| REE | ~ | Rain | 0.273584 | 0.042056 | 6.505243 | 7.756795e-11 |
| REE | ~ | DW | 0.072705 | 0.039009 | 1.863802 | 6.234947e-02 |
| DW | ~ | UAV | 0.149434 | 0.082937 | 1.801769 | 7.158176e-02 |
| DW | ~ | Rain | -0.074594 | 0.063376 | -1.177009 | 2.391921e-01 |
| d_BDLP | ~ | UAV | -0.626973 | 0.053588 | -11.699913 | 0.000000e+00 |
| d_BDLP | ~ | Rain | 0.531183 | 0.042284 | 12.562257 | 0.000000e+00 |
| d_BDLP | ~ | DW | -0.209429 | 0.036842 | -5.684436 | 1.312450e-08 |
| d_BDLP | ~ | REE | -0.317469 | 0.055320 | -5.738770 | 9.536672e-09 |
| DW | ~~ | DW | 2.111946 | 0.175996 | 12.000000 | 0.000000e+00 |
| REE | ~~ | REE | 0.925567 | 0.077131 | 12.000000 | 0.000000e+00 |
| d_BDLP | ~~ | d_BDLP | 0.815766 | 0.067980 | 12.000000 | 0.000000e+00 |

Note: ∼ to specify structural part, =∼ to specify measurement part, ∼∼ to specify common variance between variables.

**Table.S11 Ranking the top 30 LSD topic word by weight**

|  | **Word in English** | **Word in Chinese** | **Weight** | **Perceptual category** |
| --- | --- | --- | --- | --- |
| **0** | Rescue | 救援 | 0.041 | Casualties |
| **1** | Seek assist | 求助 | 0.029 | Casualties |
| **2** | Rescue team | 救援队 | 0.024 | Casualties |
| **3** | Information | 信息 | 0.024 |  |
| **4** | Provide | 提供 | 0.020 |  |
| **5** | Telephone | 电话 | 0.019 | Communication |
| **6** | Support material | 物资 | 0.015 |  |
| **7** | Channel | 通道 | 0.014 |  |
| **8** | Mutual assistance | 互助 | 0.013 |  |
| **9** | Document | 文档 | 0.013 |  |
| **10** | Contact information | 联系方式 | 0.011 |  |
| **11** | Exigency | 紧急 | 0.010 |  |
| **12** | Board and lodging | 食宿 | 0.009 |  |
| **13** | Canoe | 皮划艇 | 0.006 |  |
| **14** | help | 救助 | 0.006 | Casualties |
| **15** | Flood prevention | 防汛 | 0.006 |  |
| **16** | Emergency | 应急 | 0.006 |  |
| **17** | Fill in | 填写 | 0.005 |  |
| **18** | Hydrops | 积水 | 0.005 | Transport/Building |
| **19** | Be trapped | 被困 | 0.005 | Casualties |
| **20** | Power supply | 供电 | 0.005 | WE |
| **21** | Special population | 特殊人群 | 0.005 |  |
| **22** | Thank you | 感谢 | 0.005 |  |
| **23** | Tencent | 腾讯 | 0.004 |  |
| **24** | Cell phone | 手机 | 0.004 | Communication |
| **25** | Map | 地图 | 0.004 |  |
| **26** | Life-saving | 救命 | 0.004 | Casualties |
| **27** | UAV | 无人机 | 0.004 |  |
| **28** | Life jacket | 救生衣 | 0.004 |  |
| **29** | Support | 支援 | 0.003 |  |

**Table.S12 Ranking the top 30 UAV topic word by weight**

|  | **Word in English** | **Word in Chinese** | **Weight** | **Perceptual category** |
| --- | --- | --- | --- | --- |
| **0** | 'UAV', | '无人机', | 0.044 |  |
| **1** | 'Rescue', | '救援', | 0.043 | Casualties |
| **2** | 'Cell phone' | '手机', | 0.022 | Communication |
| **3** | 'Information ', | '信息', | 0.016 |  |
| **4** | 'Mutual aid ', | '互助', | 0.015 |  |
| **5** | 'Help ', | '求助', | 0.014 | Casualties |
| **6** | 'Rescue Team ', | '救援队', | 0.013 |  |
| **7** | 'Flashlight ', | '手电筒', | 0.013 |  |
| **8** | 'Search ', | '搜寻', | 0.012 | Casualties |
| **9** | 'Offer ', | '提供', | 0.012 |  |
| **10** | 'Telephone ', | '电话', | 0.011 | Communication |
| **11** | 'in the air' | '空中', | 0.010 |  |
| **12** | 'Save yourself ', | '自救', | 0.008 |  |
| **13** | 'disaster' | '受灾', | 0.008 |  |
| **14** | 'Material ', | '物资', | 0.008 |  |
| **15** | 'Diffuse information ', | '扩散', | 0.007 |  |
| **16** | 'Channel ', | '通道', | 0.006 |  |
| **17** | 'Emergency ', | '应急', | 0.006 |  |
| **18** | 'urgent' | '紧急', | 0.006 |  |
| **19** | 'Contact information ', | '联系方式', | 0.005 |  |
| **20** | 'spread information ', | '扩转', | 0.005 |  |
| **21** | 'Flood control ', | '防汛', | 0.004 |  |
| **22** | 'Trapped ', | '被困', | 0.004 |  |
| **23** | 'Room and board ', | '食宿', | 0.004 |  |
| **24** | 'Kayaking' | '皮划艇', | 0.004 |  |
| **25** | 'Communication ', | '通信', | 0.003 | Communication |
| **26** | 'hydrops' | '积水', | 0.003 | Transport/Buildings |
| **27** | 'Rescue2', | '救助', | 0.003 | Casualties |
| **28** | 'Power supply ', | '供电', | 0.003 | WE |
| **29** | 'Fill in' | '填写' | 0.002 |  |

**Table.S13 Ranking the top 30 AMap topic word by weight**

|  | **Word in English** | **Word in Chinese** | **Weight** | **Perceptual category** |
| --- | --- | --- | --- | --- |
| **0** | 'Mutual aid ', | '互助', | 0.044 |  |
| **1** | 'AMap ', | '高德', | 0.043 |  |
| **2** | 'Channel ', | '通道', | 0.022 |  |
| **3** | 'Information ', | '信息', | 0.016 |  |
| **4** | 'Rescue ', | '救援', | 0.015 | Casualties |
| **5** | 'Amap2 ', | '高德地图', | 0.014 |  |
| **6** | 'Ask for help ', | '求助', | 0.013 | Casualties |
| **7** | 'Map ', | '地图', | 0.013 |  |
| **8** | 'Function ', | '功能', | 0.012 |  |
| **9** | 'Hydrops ', | '积水', | 0.012 | Transport/Buildings |
| **10** | 'Telephone ', | '电话', | 0.011 | Communication |
| **11** | 'User ', | '用户', | 0.008 |  |
| **12** | 'Refuge ', | '避难', | 0.008 | Casualties |
| **13** | 'Click ', | '点击', | 0.007 |  |
| **14** | 'Icon ', | '图标', | 0.006 | Transport |
| **15** | 'Rescue Team ', | '救援队', | 0.006 | Casualties |
| **16** | 'Material ', | '物资', | 0.006 |  |
| **17** | 'Cell phone ', | '手机', | 0.005 | Communication |
| **18** | 'Offer ', | '提供', | 0.005 |  |
| **19** | 'The Internet ', | '互联网', | 0.004 |  |
| **20** | 'Urgent ', | '紧急', | 0.004 |  |
| **21** | 'Rush to the aid ', | '驰援', | 0.003 |  |
| **22** | 'Method ', | '方法', | 0.003 |  |
| **23** | 'Rescue2 ', | '救助', | 0.003 |  |
| **24** | 'Public good ', | '公益', | 0.003 |  |
| **25** | 'Disaster relief' | '救灾' | 0.002 |  |
| **26** | ‘Come on’ | 加油 | 0.002 |  |
| **27** | 'Hard work' | 辛苦 | 0.002 |  |
| **28** | 'Guarantee' | 保障 | 0.002 |  |
| **29** | 'One side is in trouble' | 一方有难 | 0.002 |  |

**Table.S14 Ranking the top 30 DW topic word by weight**

|  | **Word in English** | **Word in Chinese** | **Weight** | **Perceptual category** |
| --- | --- | --- | --- | --- |
| **0** | 'Rescue', | '救援', | 0.049025446, | Casualties |
| **1** | 'Dragon water drainage' | '龙吸水', | 0.04264485, |  |
| **2** | 'Equipment' | '设备', | 0.023501871, |  |
| **3** | 'Subway', | '地铁', | 0.018889911, | Transport |
| **4** | 'Urgent need ', | '急需', | 0.015604705, |  |
| **5** | 'Fire ', | '消防', | 0.012129947, |  |
| **6** | 'Tunnel ', | '隧道', | 0.010803213, | Transport |
| **7** | 'Emergency' | '应急', | 0.009855573, |  |
| **8** | 'Drainage ', | '排涝', | 0.0070125735, | Transport/Building |
| **9** | 'Urgent ', | '紧急', | 0.006949406, |  |
| **10** | 'Rush to the aid ', | '驰援', | 0.0047381907, |  |
| **11** | 'Commander ', | '指战员', | 0.004548657, |  |
| **12** | 'Flood control ', | '防汛', | 0.004548657, |  |
| **13** | 'Equipment2', | '装备', | 0.004548657, |  |
| **14** | 'Water-logged ', | '积水', | 0.004422305, | Transport/Building |
| **15** | 'Boat ', | '舟艇', | 0.004043238, |  |
| **16** | 'Reinforcements ', | '增援', | 0.0039800643, |  |
| **17** | 'Dispatch ', | '调派', | 0.0039800643, |  |
| **18** | 'Drain ', | '排水', | 0.0037273522, | Transport/Building |
| **19** | 'Trapped ', | '被困', | 0.0036641753, | Casualties |
| **20** | 'Mutual aid ', | '互助', | 0.003600997, |  |
| **21** | 'High power ', | '大功率', | 0.0031587554, |  |
| **22** | 'Remote ', | '远程', | 0.0031587551, |  |
| **23** | 'Flood fighting and rescue ', | '抗洪抢险', | 0.0029692245, |  |
| **24** | 'Rescue and disaster relief' | '抢险救灾', | 0.0029060459, |  |
| **25** | 'Disaster relief ', | '救灾', | 0.0027796903, |  |
| **26** | 'Hebei ', | '河北', | 0.002716512, |  |
| **27** | 'Transfer ', | '转移', | 0.0025901587, |  |
| **28** | 'Detachment ', | '支队', | 0.0025269813, |  |
| **29** | 'Disaster relief' | '山西' | 0.0024638034 |  |

**Table.S15 Ranking the top 30 BS topic word by weight**

|  | **Word in English** | **Word in Chinese** | **Weight** |
| --- | --- | --- | --- |
| **0** | ' Bike-sharing ', | 共享单车 | 0.009695 |
| **1** | ' Hydrops ' | 积水 | 0.007162 |
| **2** | ' Cell phone ' | 手机 | 0.005412 |
| **3** | 'Signal ', | 信号 | 0.00327 |
| **4** | 'Riding ', | 骑行 | 0.003224 |
| **5** | 'Heavy rain', | 大雨 | 0.003132 |
| **6** | 'Power failure', | 停电 | 0.002671 |
| **7** | 'Bicycle', | 单车 | 0.002073 |
| **8** | 'Traffic ', | 通行 | 0.001796 |
| **9** | 'Pavement ', | 路面 | 0.001796 |
| **10** | 'No electricity ', | 没电 | 0.00152 |
| **11** | ' Electric vehicle ', | 电动车 | 0.001428 |
| **12** | ' Depth of water ', | 水深 | 0.000897 |
| **13** | 'In the water ', | 水里 | 0.001382 |
| **14** | 'Rainwater ', | 雨水 | 0.001359 |
| **15** | ' A section of a road ', | 路段 | 0.001336 |
| **16** | ' Network ', | 网络 | 0.001267 |
| **17** | Be flooded | 被淹 | 0.00122 |
| **18** | Network | 网 | 0.000944 |
| **19** | Motorcycle | 电单车 | 0.000806 |
| **20** | Tram | 电车 | 0.000737 |
| **21** | No signal | 没信号 | 0.000714 |
| **22** | Outage | 断电 | 0.000714 |
| **23** | No Internet connection | 没网 | 0.000690769 |

**Table.S16** **Ranking the top 30 MC topic word by weight**

|  | **Word in English** | **Word in Chinese** | **Weight** |
| --- | --- | --- | --- |
| **0** | 'Telephone' | 电话 | 0.037182 |
| **1** | ' Not working ', | 打不通 | 0.033317 |
| **2** | ' Mobile phone ', | 手机 | 0.005063 |
| **3** | 'Signal ', | 信号 | 0.004382 |
| **4** | ' Loss of connection', | 失联 | 0.004079 |
| **5** | ' power failure ', | 停电 | 0.00326 |
| **7** | ' text ', | 发短信 | 0.002511 |
| **8** | ' No electricity ', | 没电 | 0.001879 |
| **9** | ' Electrical circuit', | 线路 | 0.001859 |
| **10** | ' Outage ', | 断电 | 0.001827 |
| **11** | ' Shutdown ', | 关机 | 0.001804 |
| **12** | ' No signal ', | 没信号 | 0.001758 |
| **13** | ' WeChat ', | 微信 | 0.001749 |
| **14** | ' Busy line', | 占线 | 0.001253 |
| **15** | ' Phone shutdown ', | 电话关机 | 0.000917 |
| **16** | ' Network disconnection ', | 断网 | 0.000854 |
| **17** | ' network ', | 网络 | 0.000833 |
| **18** | ' Mobile phone signal ', | 手机信号 | 0.000616 |

**Table.S17 Ranking the top 30 MP topic word by weight**

|  | **Word in English** | **Word in Chinese** | **Weight** |
| --- | --- | --- | --- |
| **0** | Mobile payment' | 手机支付 | 0.009752 |
| **1** | 'Mobile phone' | 手机 | 0.007558 |
| **2** | 'Power outage' | 停电 | 0.007314 |
| **3** | 'Network' | 网络 | 0.005364 |
| **4** | 'Signal' | 信号 | 0.004389 |
| **5** | 'Electronic payment' | 电子支付 | 0.004145 |
| **6** | 'Disaster' | 灾难 | 0.004145 |
| **7** | 'Outage' | 断电 | 0.003413 |
| **8** | 'No electricity' | 没电 | 0.003169 |
| **9** | 'No network' | 没网 | 0.002926 |
| **10** | 'Mobile phone signal' | 手机信号 | 0.002926 |
| **11** | 'Internet' | 互联网 | 0.002438 |
| **12** | 'No signal' | 没信号 | 0.002194 |
| **13** | 'WeChat' | 微信 | 0.00195 |
| **14** | Mobile payment' | 移动支付 | 0.00195 |
| **15** | 'Takeaway' | 外卖 | 0.00195 |
| **16** | 'Payment' | 支付 | 0.001707 |
| **17** | 'On credit' | 赊账 | 0.001707 |
| **18** | 'Network disconnection' | 断网 | 0.001707 |

**Table.S18 Description of symbols and formulas**

| **Symbols or formulas** | **Formulas** |
| --- | --- |
| ∼ | to specify structural part |
| =∼ | to specify measurement part |
| ∼∼ | to specify common variance between variables |
| FLP | Overall flood loss perception |
| CMLP | Communication perception loss percaption |
| CALP | Casualty loss perception |
| TRLP | Transport loss perception |
| WELP | Water and electricity loss perception |
| BDLP | Building loss perception |
| UAV index | text frequency index of UAVs |
| LSD index | text frequency index of lifesaving document |
| Amap index | text frequency index of Amap |
| DW index | text frequency index of DW（dragon water absorption） |
| Precipitation,Rainfall | Precipitation intensity |
| d_CMLP | Change in Communication Loss Perception: the difference between the CLI of the current hour and the CLI of the previous hour |
| d_CALP | Change in Casuality Loss Perception: the difference between the CALI of the current hour and the CALI of the previous hour |
| d_WELP | Change in Water and electricity supply Loss Perception: the difference between the WELP of the current hour and the WELP of the previous hour, |
| d_TRLP | Change in Transport Loss perception: the difference between the TRLP of the current hour and the TRLP of the previous hour, |
| d_BDLP | Change in Building Loss perception: the difference between the BDLP of the current hour and the BDLP of the previous hour, |

**Table.S19 Interpretation of the statistics used**

| **Statistics** | **Interpretation** | **Source** |
| --- | --- | --- |
| FLP | Overall flood loss perception | Weibo text data |
| CMLP | Communication perception loss perception | Weibo text data |
| CALP | Casualty loss perception | Weibo text data |
| TRLP | Transport loss perception | Weibo text data |
| WELP | Water and electricity loss perception | Weibo text data |
| BDLP | Building loss perception | Weibo text data |
| UAV index | text frequency index of UAVs | Weibo text data |
| LSD index | text frequency index of lifesaving document | Weibo text data |
| Amap index | text frequency index of Amap | Weibo text data |
| DW index | text frequency index of DW（dragon water absorption） | Weibo text data |
| Hourly Precipitation/Rainfall | Precipitation data from a total of 16 stations in Zhengzhou and Xinxiang | China National Meteorological Science Data Center |

Note: The time interval for the subsequent data was from 0:00 on July 12, 2021 to 24:00 on August 10, 2021, and the samples were collected at an interval of one hour.

**Table.S20 Performance of text classification model**

|  | precision | recall | f1-score |
| --- | --- | --- | --- |
| class1 | 0.92 | 0.83 | 0.87 |
| class2 | 0.81 | 0.84 | 0.83 |
| class3 | 0.87 | 0.92 | 0.89 |
| accuracy |  |  | 0.87 |
| Macro avg | 0.87 | 0.86 | 0.86 |
| Weighted avg | 0.87 | 0.87 | 0.87 |

**Figure.S1** **Max rainfall indicator**


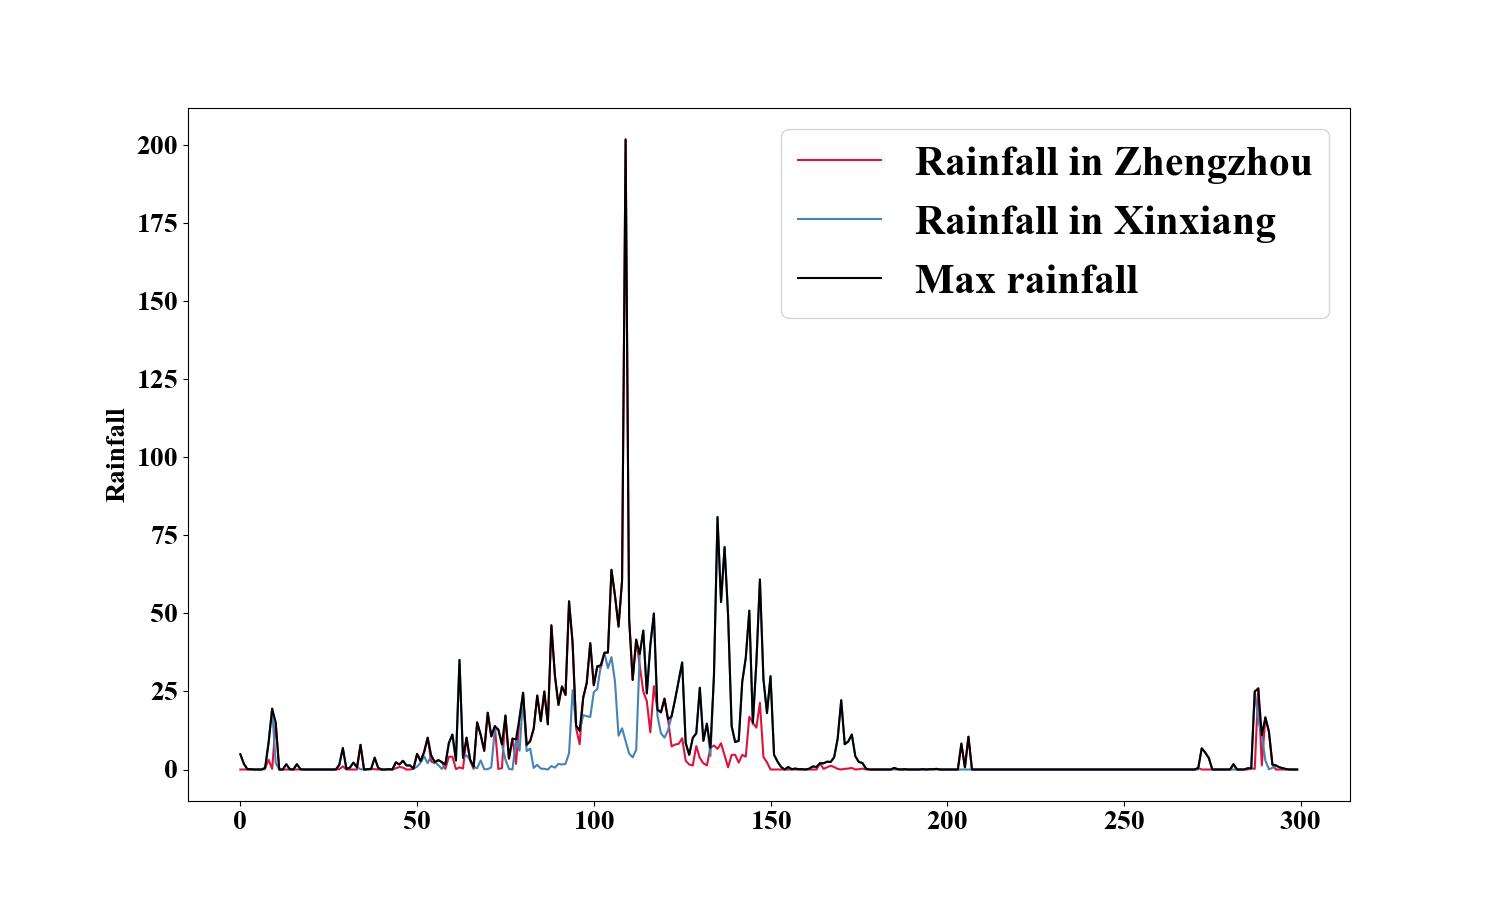


**Fig.S1 Max rainfall indicator during the flood events**

Note: Rainfall in Zhengzhou is the weighted average precipitation by Tyson polygon for 8 precipitation observation points in Zhengzhou City. Rainfall in Xinxiang is the weighted average precipitation by Tyson polygon for 8 precipitation observation points in Xinxiang City.

**Figure.S2 The proportion of the four most popular technology strategies discussed on the Weibo platform**


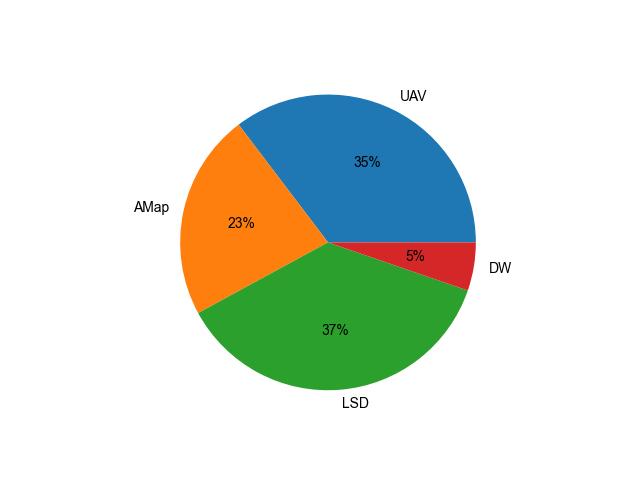


**Figure.S3 Land use in Henan Province**


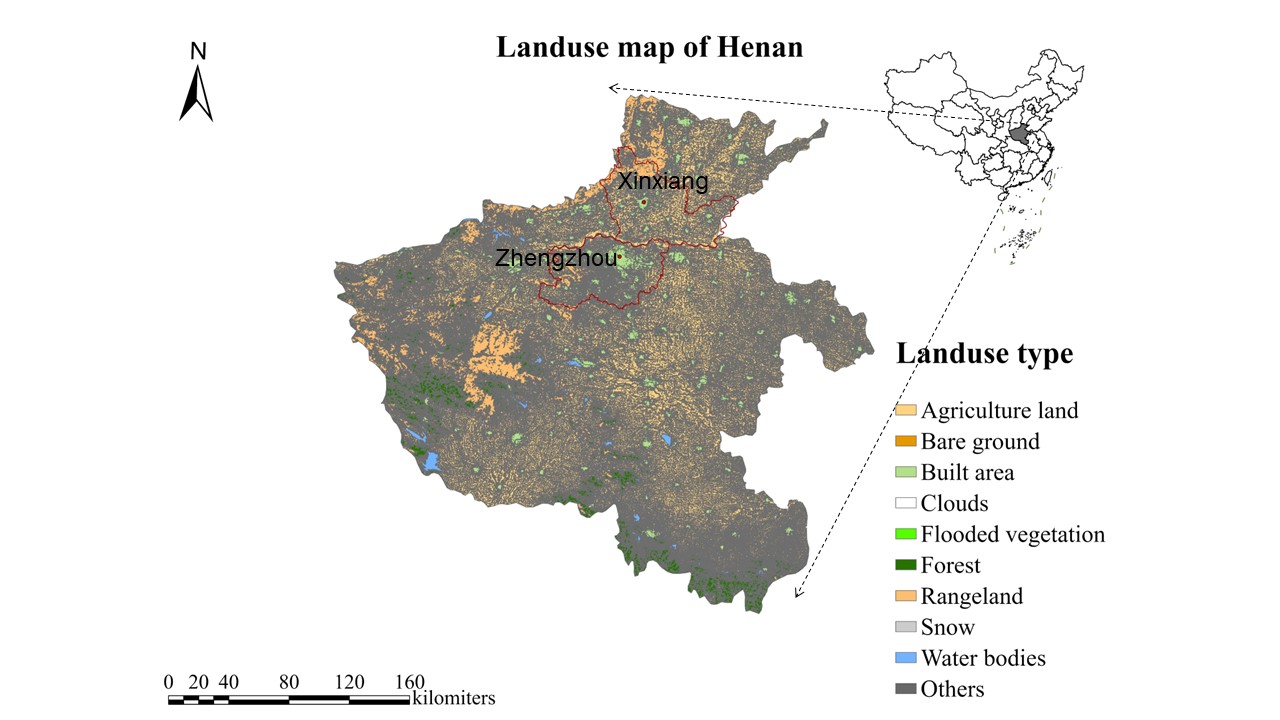


Note: Land use distribution map in Henan province

**Figure.S4 The Wing Loong UAV**

**
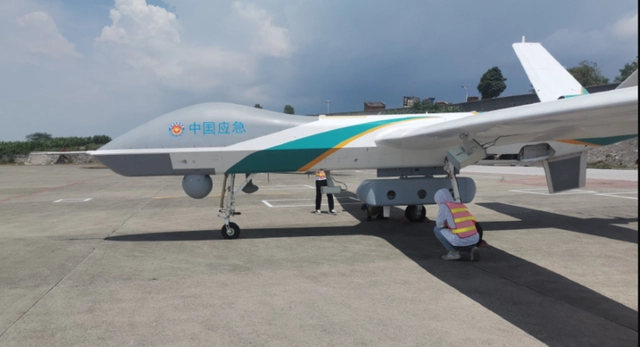
**

Note: This is Chinese Wing Loong UAV. The words on the surface of the UAV are “China Emergency” in English.

**Figure.S5 Life-saving documents**

**
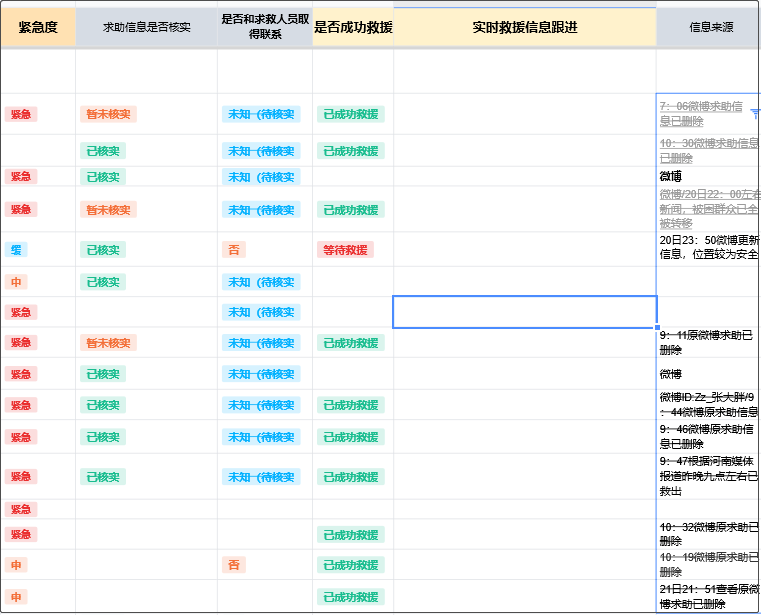
**

Note: This is the interface of Tencent rescue document used in Henan rainstorm in 2021, which is divided into the fields of emergency degree, whether the rescue information is verified, whether the rescue information is contacted with the rescuers, whether the rescue is successful, the implementation of rescue information follow-up, and the source of information.

**Figure.S6 The "Dragon Water" drainage device (DW)**

**
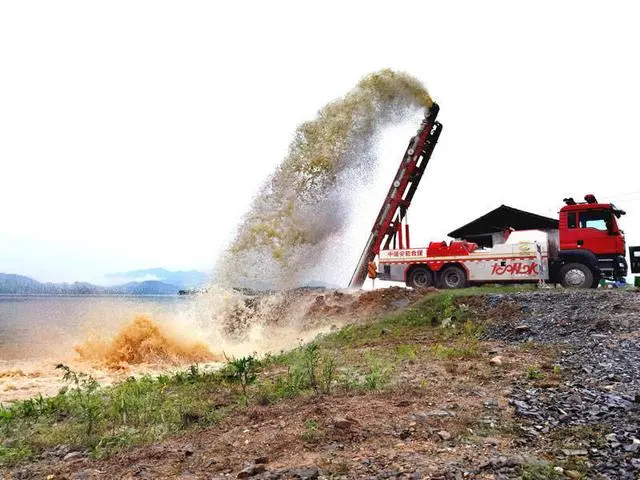
**

Note: This is Chinese Dragon water absorbent equipment (DW). The words on the surface of the DW are “Dragon water absorbent” in English.

**Figure.S7 AMap**

**
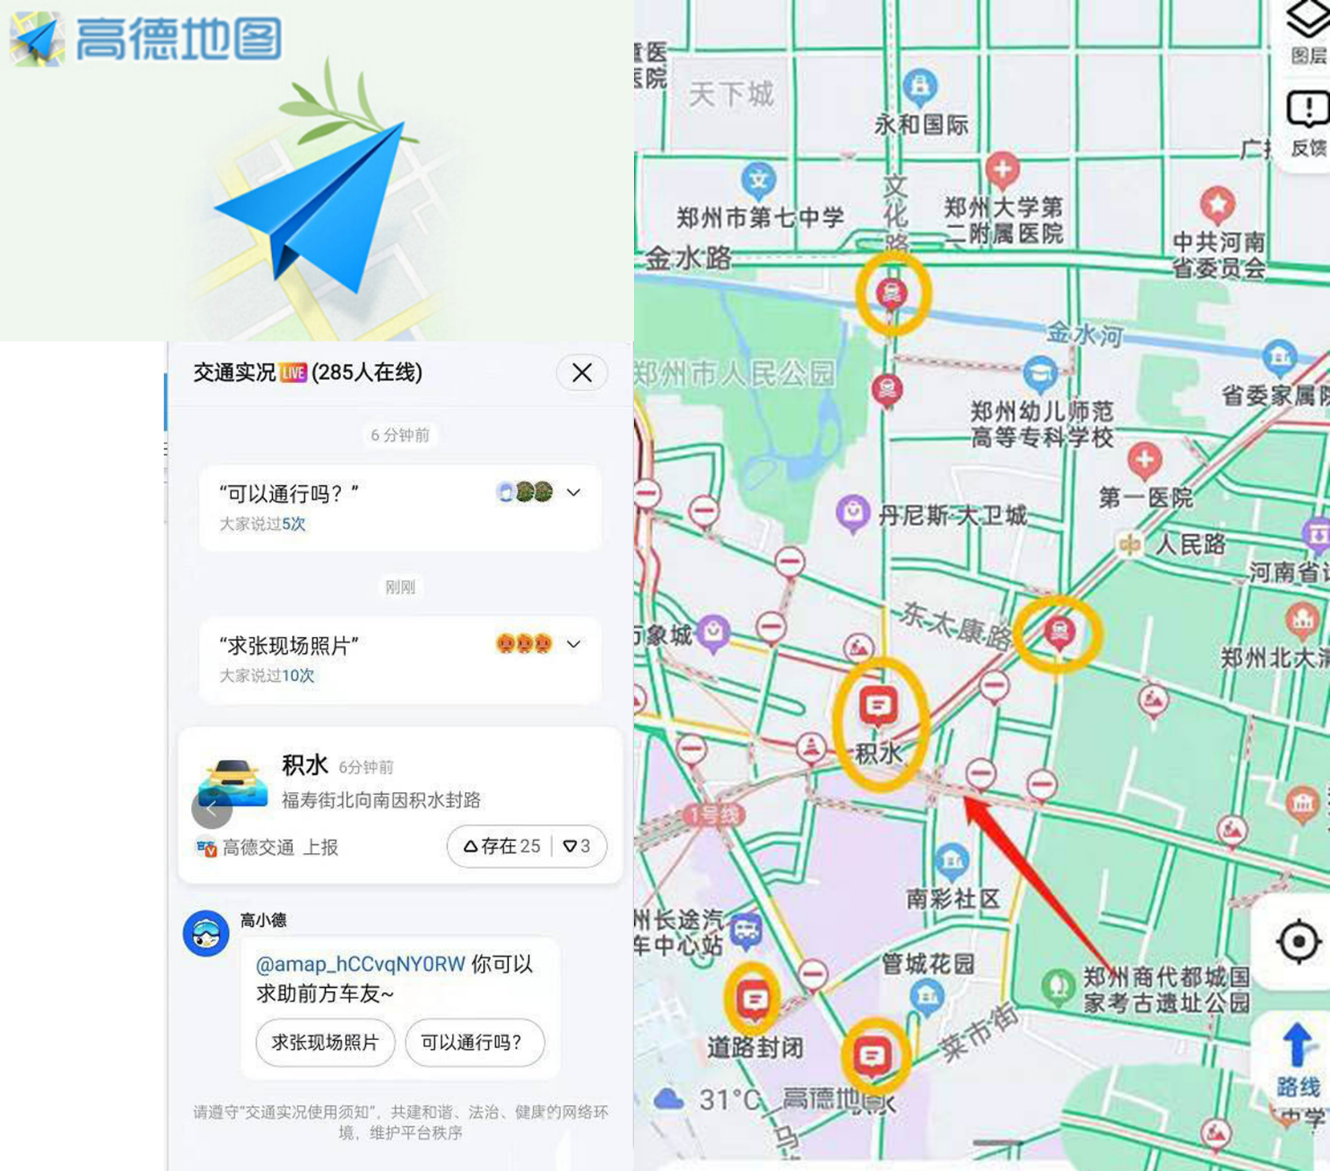
**

Note: This is the interface of Autonavi Map (AMap) used in Henan rainstorm in 2021. The red sign in picture indicates standing water (" standing water "is standing water). The above text indicates some online disaster information exchange and help information

**Figure.S8 Comparison of multiple path models for casualty loss perception**

**
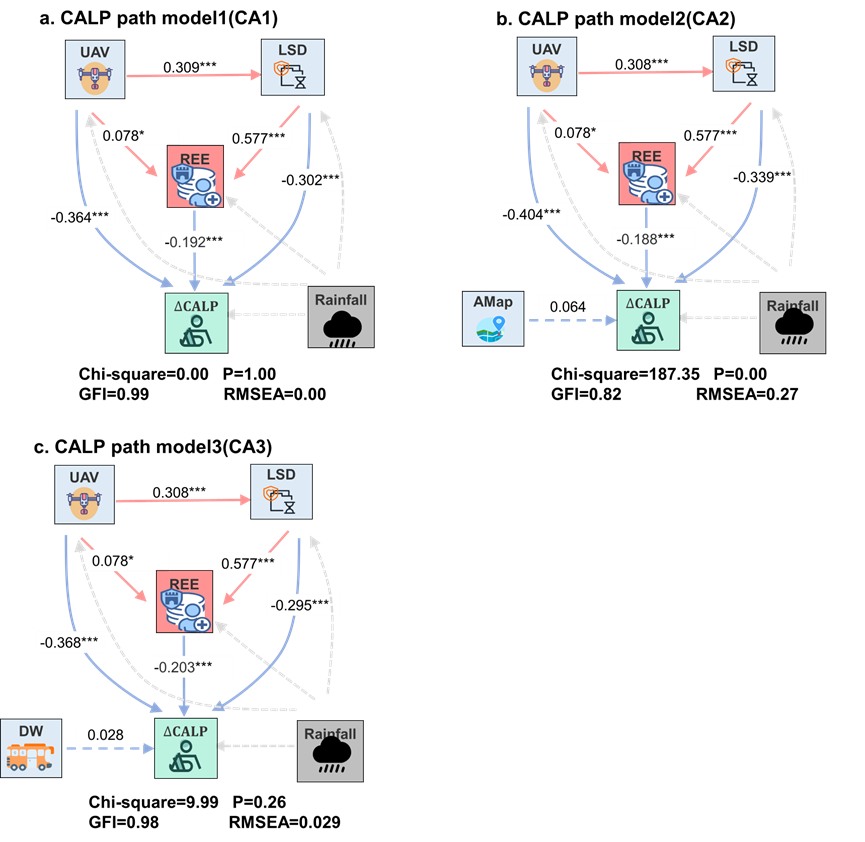
**

**Figure.S9 Comparison of multiple path models for transport loss perception**

**
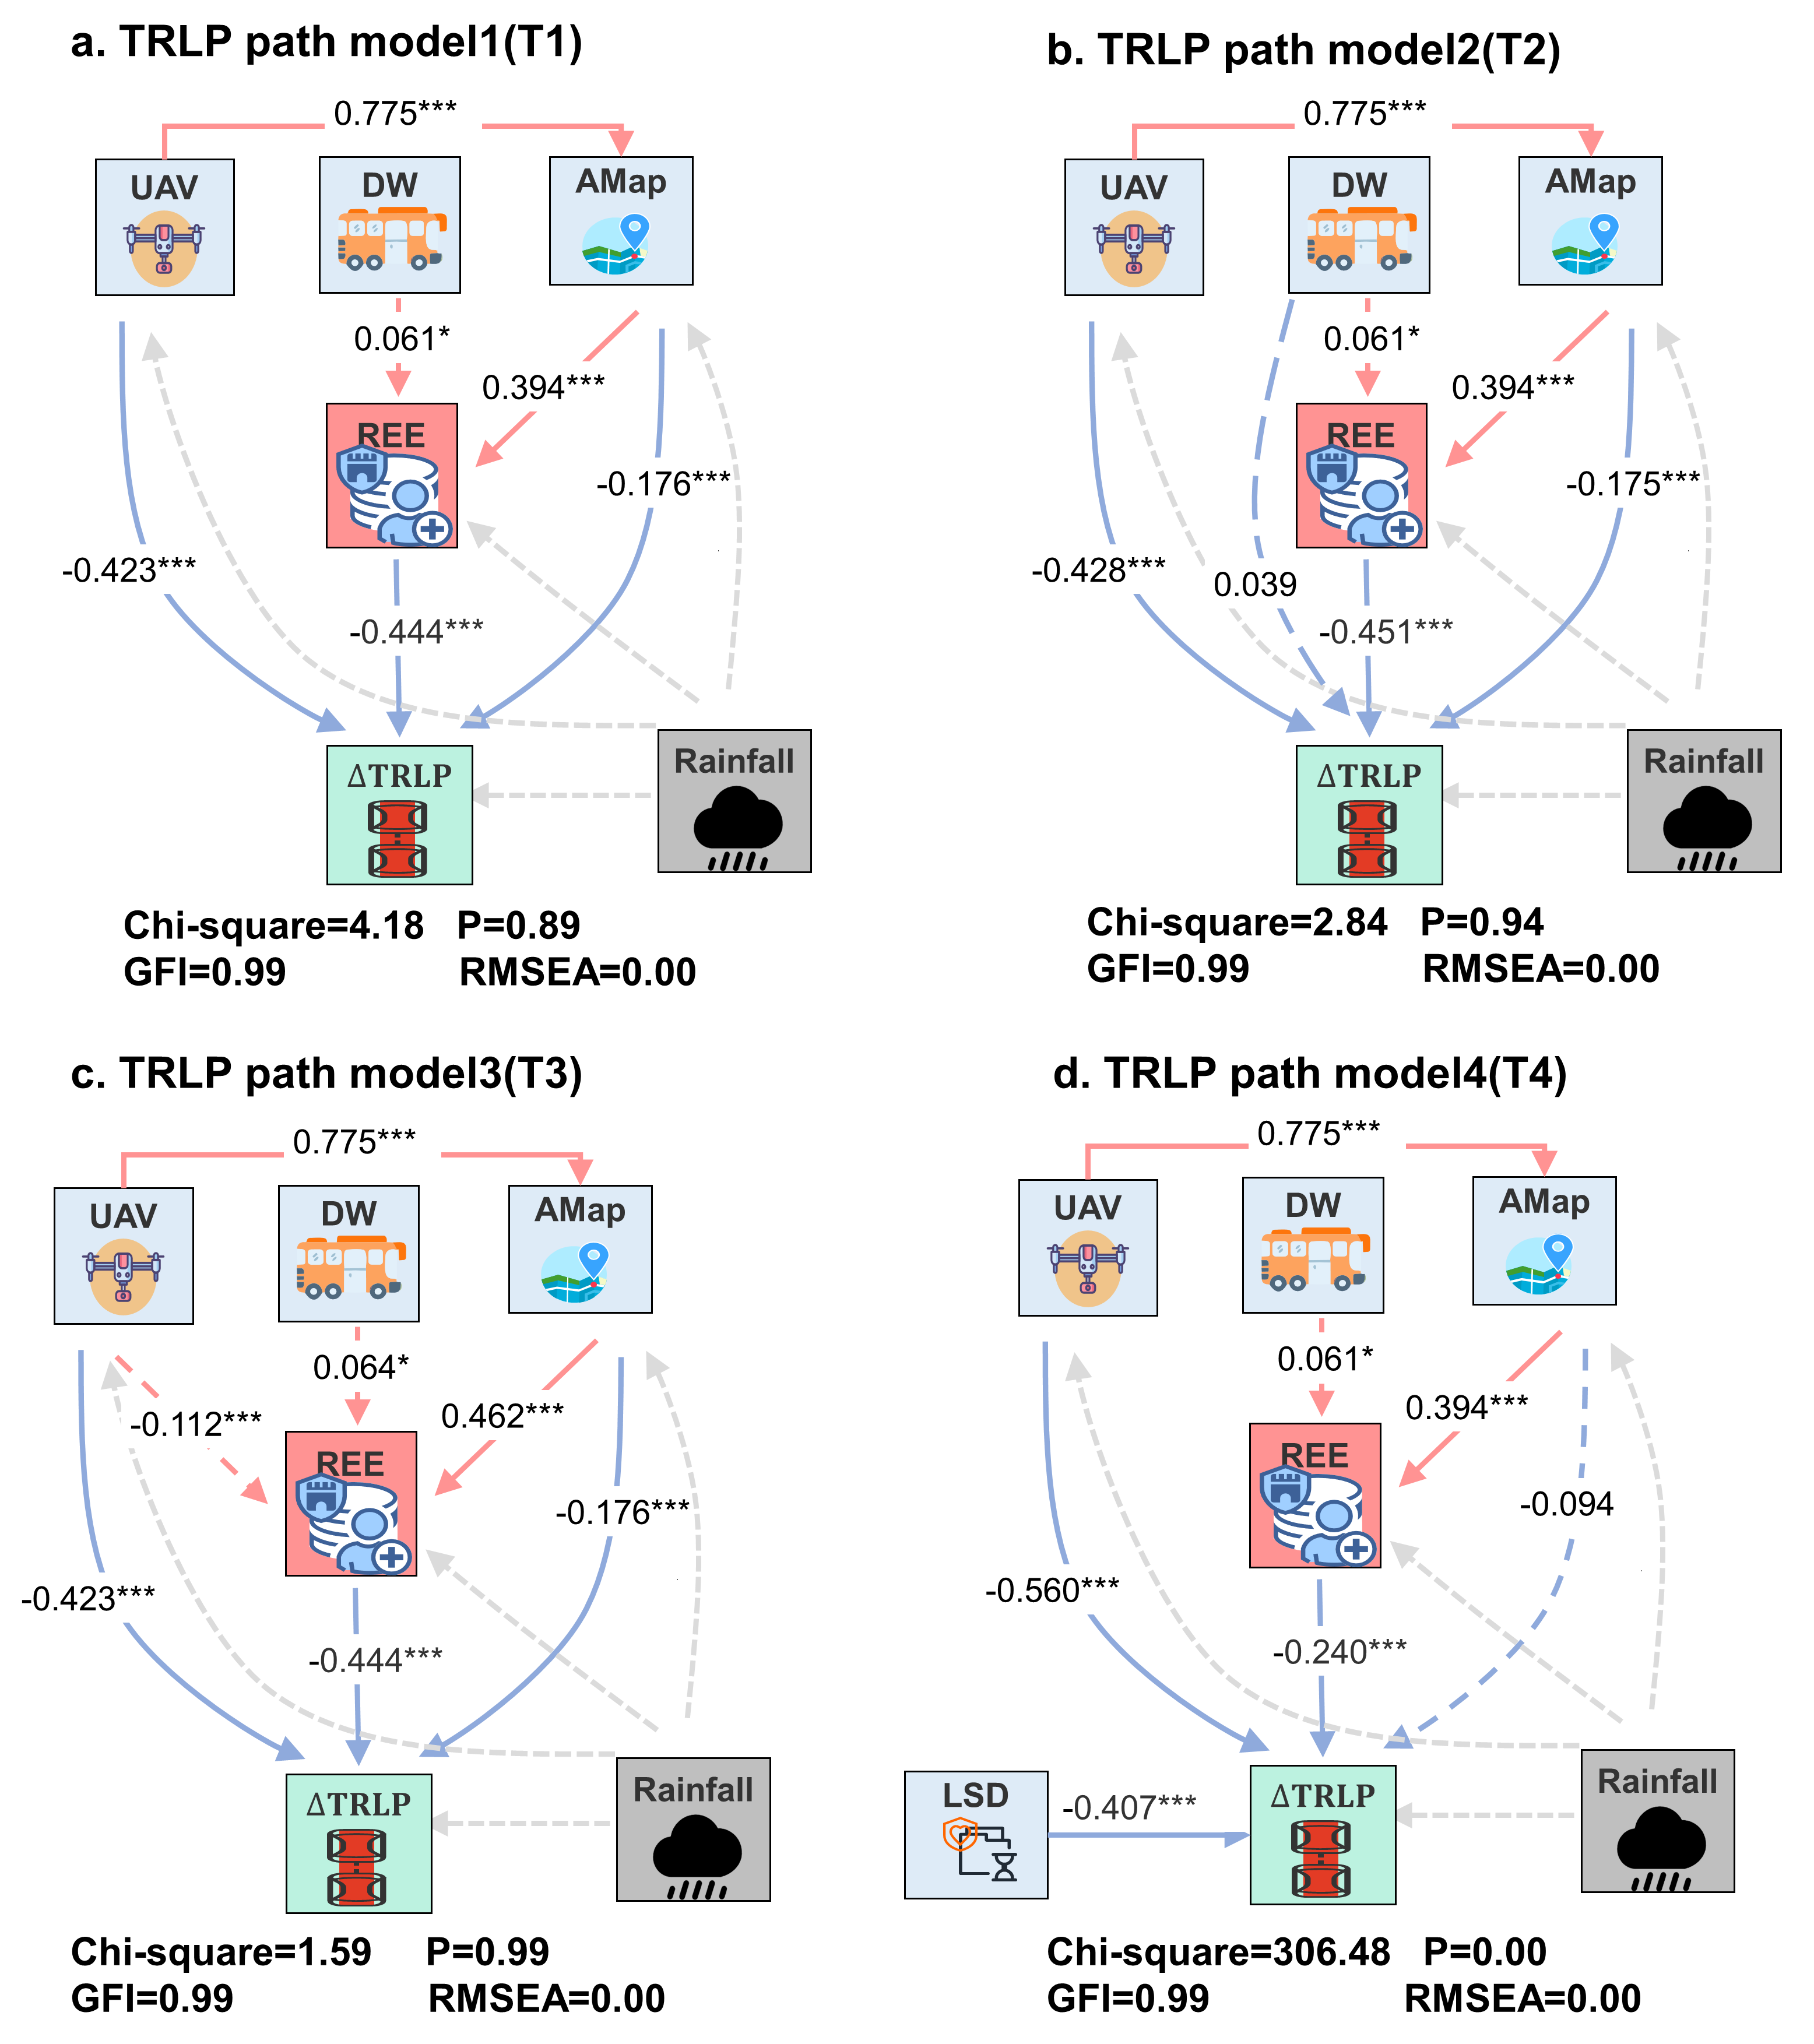
**

**Figure.S10 Comparison of multiple path models for communication loss perception**

**
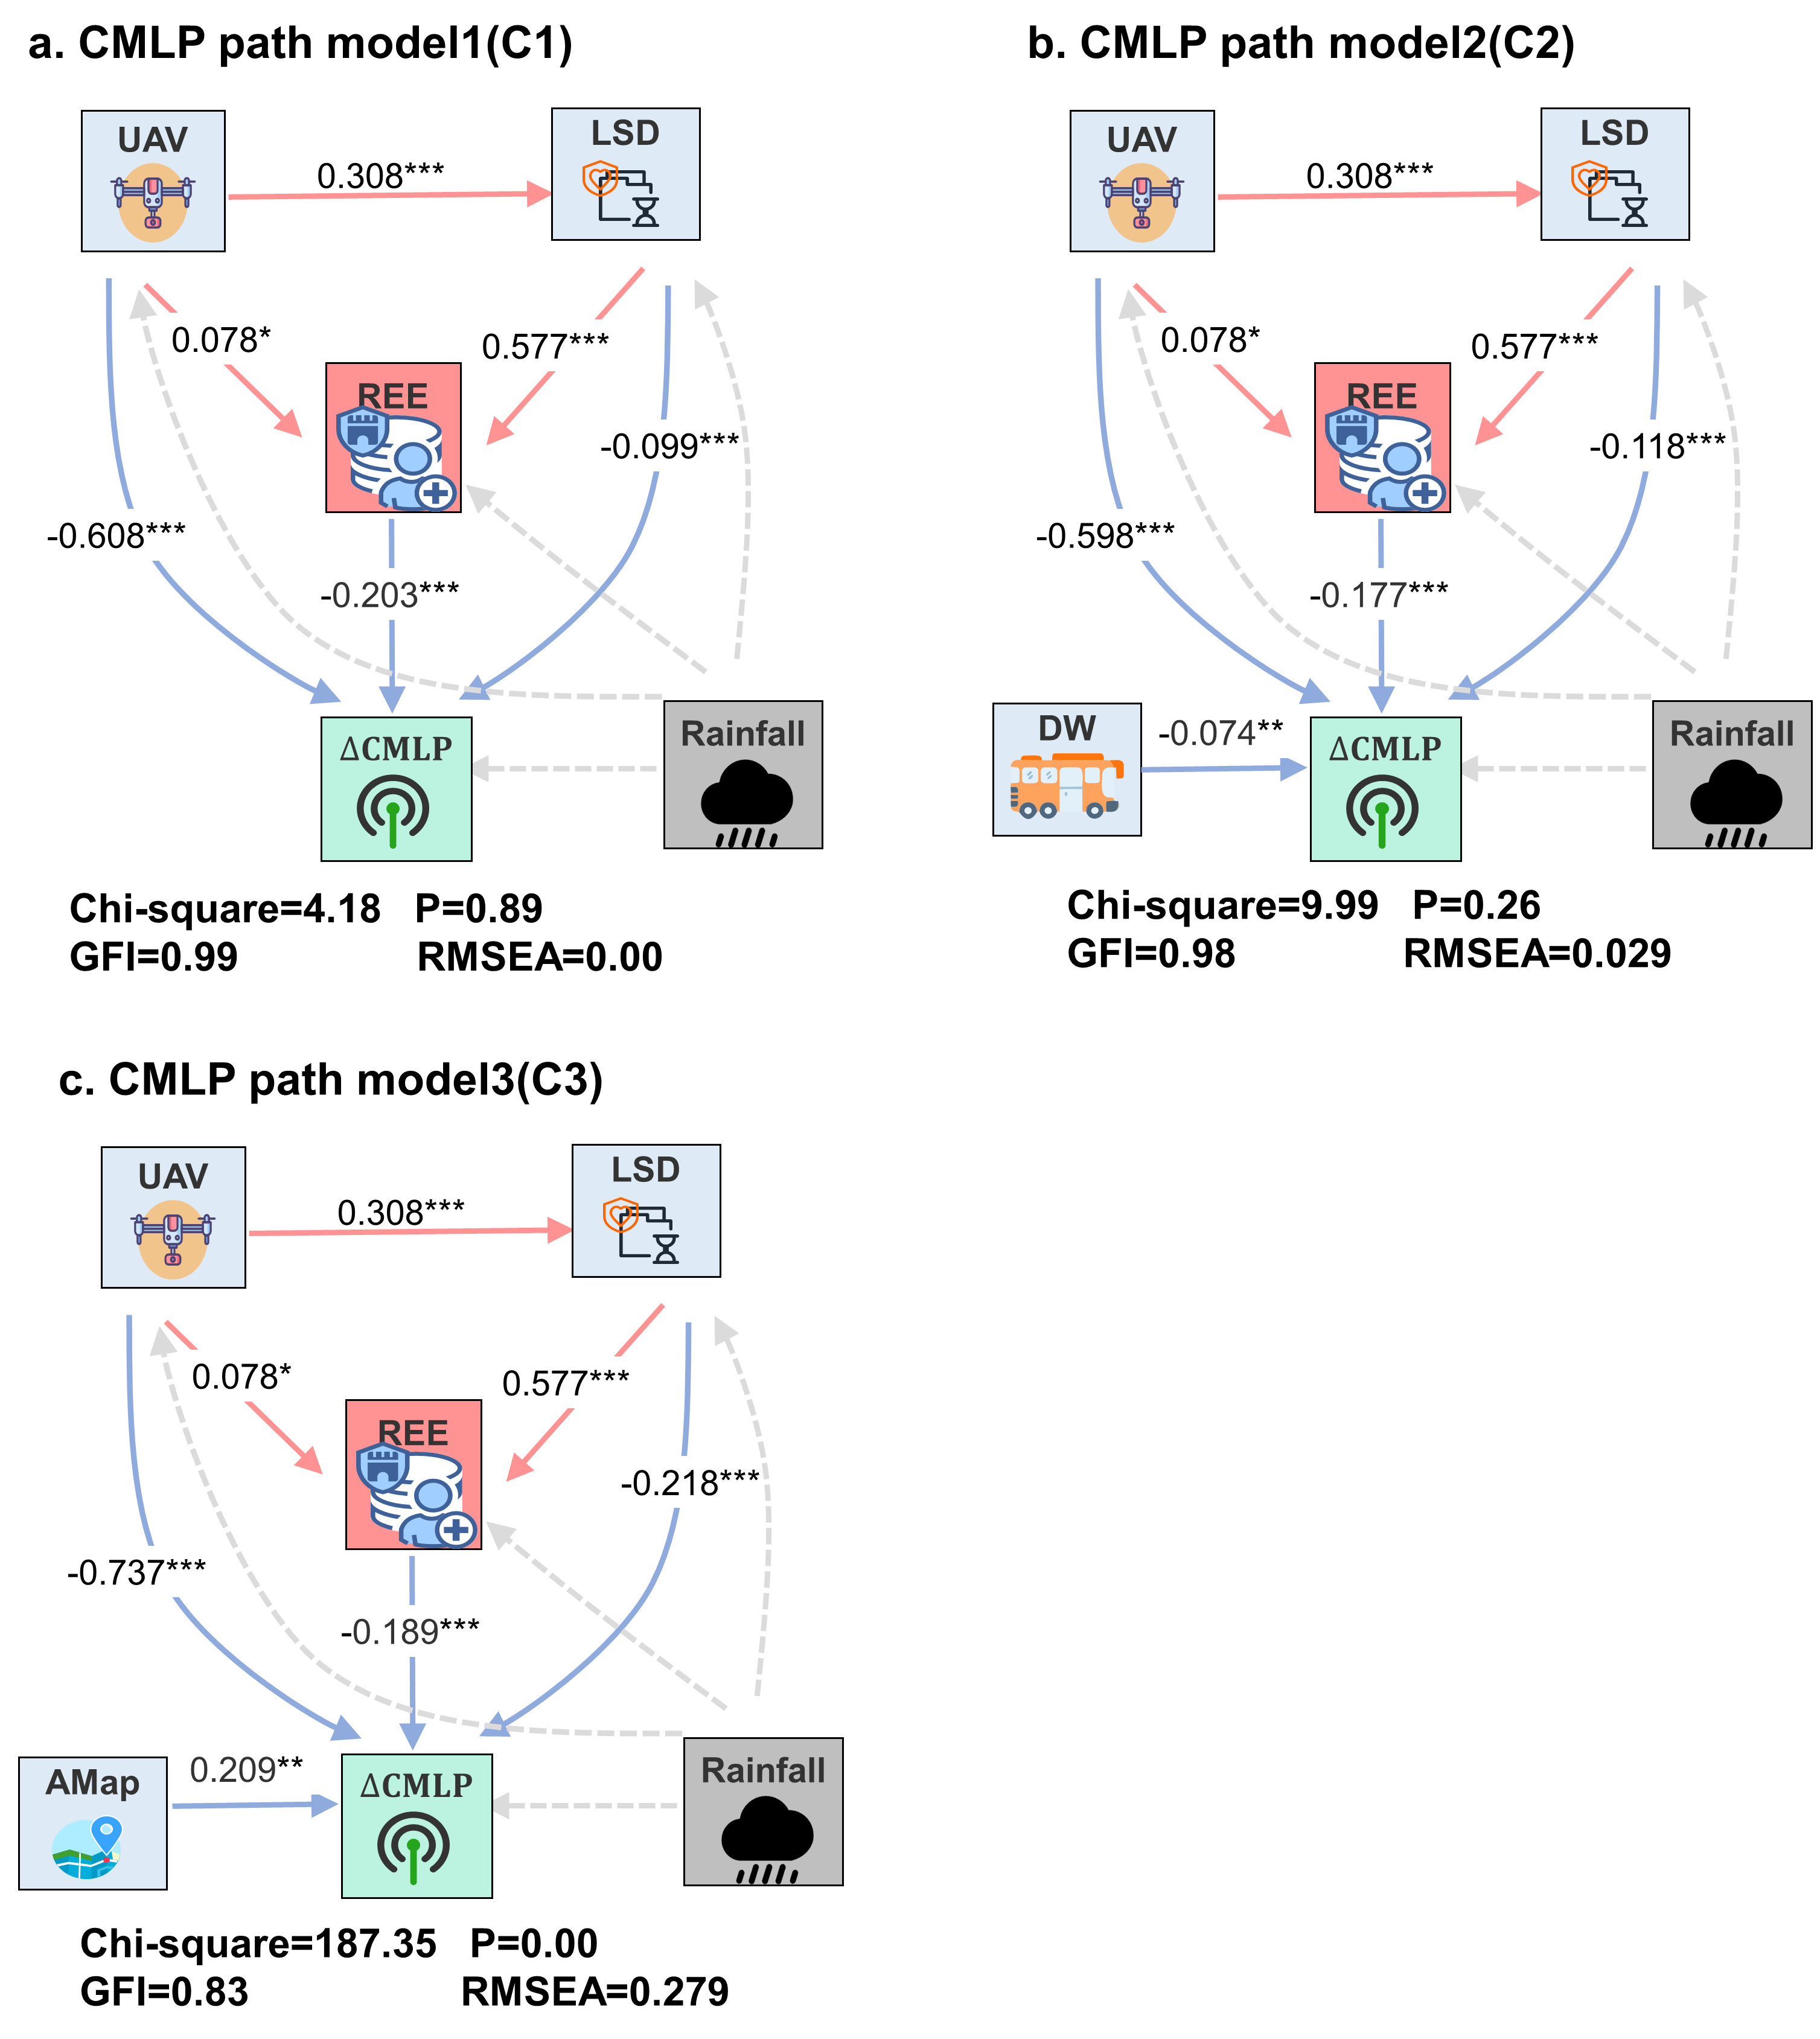
**

**Figure.S11 Comparison of multiple path models for water and electricity supply loss perception**

**
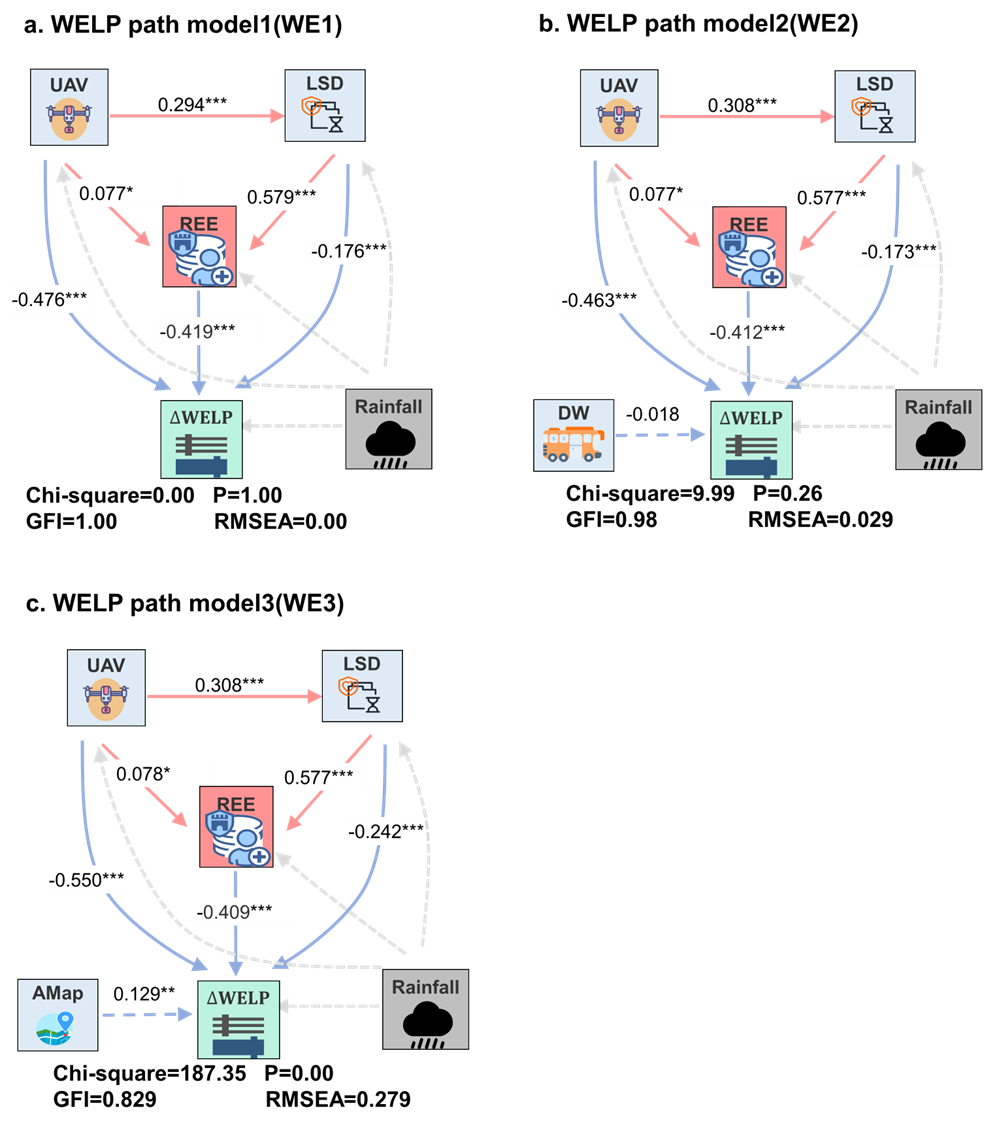
**

**Figure.S12 Comparison of multiple path models for building loss perception**

**
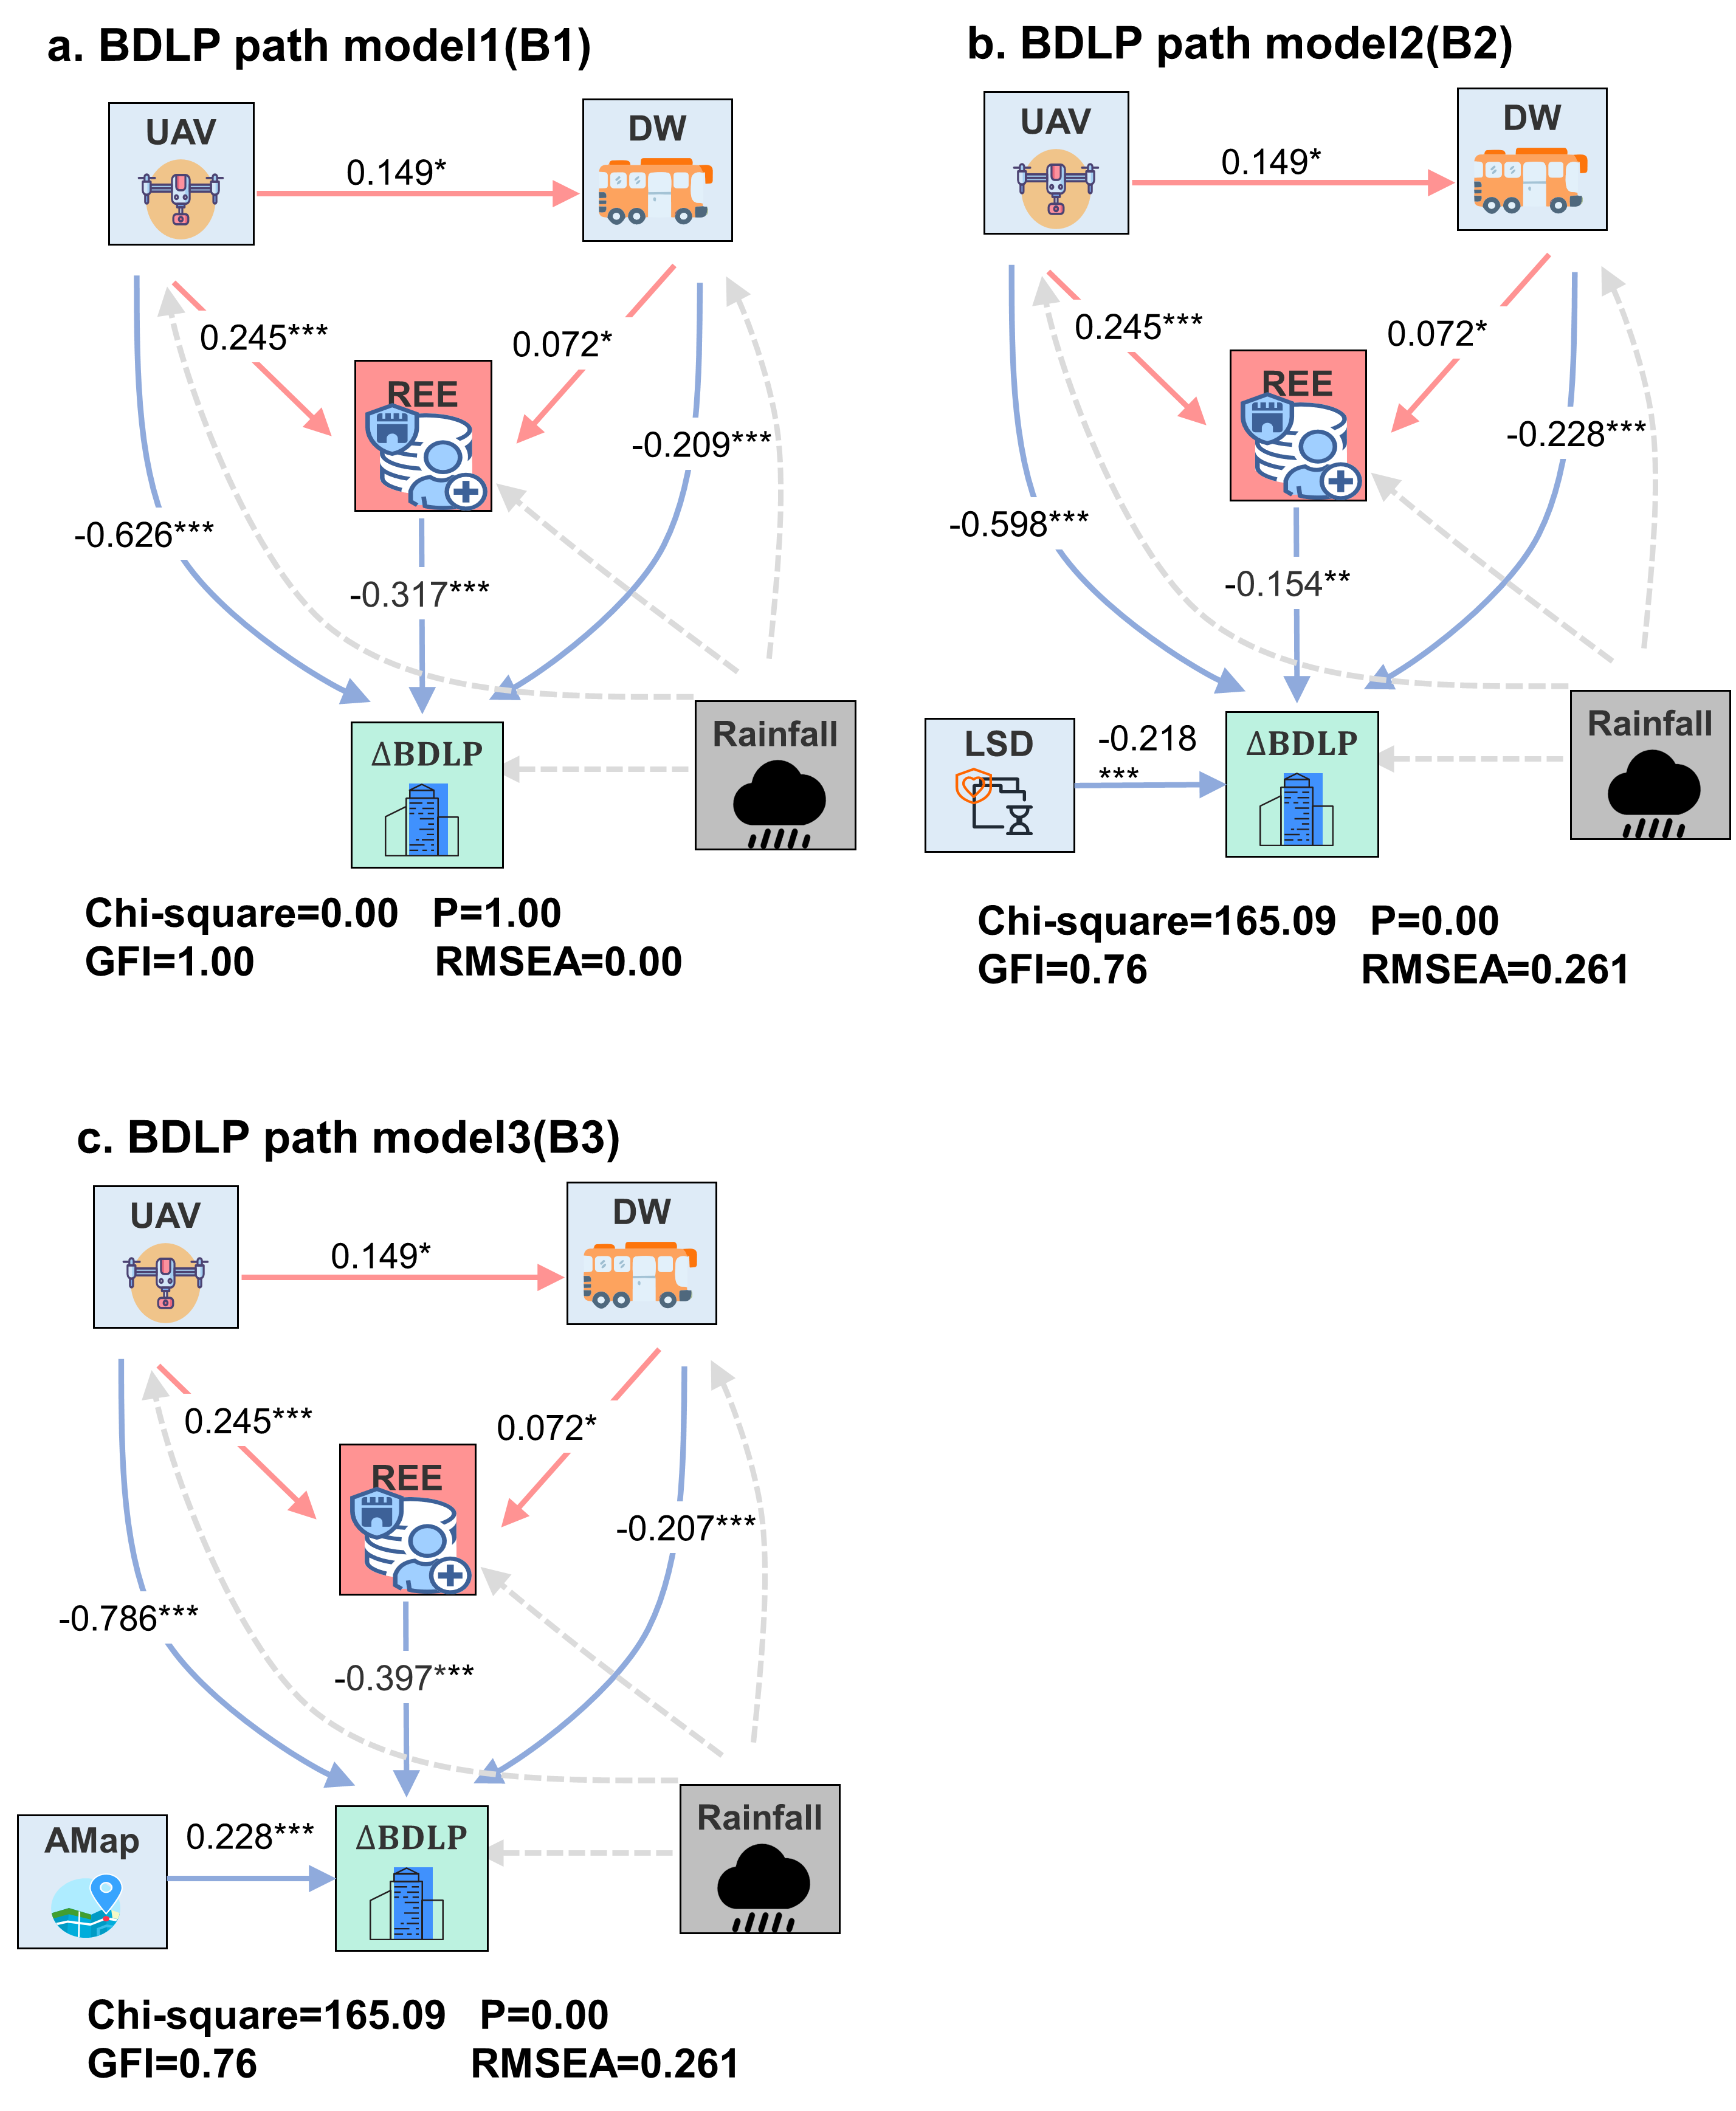
**

**References**

1. Fang J, Hu J, Shi X, Zhao L. Assessing disaster impacts and response using social media data in China: A case study of 2016 Wuhan rainstorm. *International Journal of Disaster Risk Reduction* **34**, 275-282 (2019).

2. Li X, Shang W, Wang S. Text-based crude oil price forecasting: A deep learning approach. *International Journal of Forecasting* **35**, 1548-1560 (2019).

3. Mihalcea R, Tarau P. TextRank: Bringing Order into Texts. (2004).

4. Xue B, Fu C, Zhan S. A Study on Sentiment Computing and Classification of Sina Weibo with Word2vec. In: *IEEE International Congress on Big Data*) (2014).

5. Mikolov T, Chen K, Corrado G, Dean J. Efficient Estimation of Word Representations in Vector Space. *Computer Science*, (2013).

6. Sun S, Jiang F, Feng G, Wang S, Zhang C. The impact of COVID-19 on hotel customer satisfaction: evidence from Beijing and Shanghai in China. *International Journal of Contemporary Hospitality Management* **34**, 382-406 (2021).

7. Wu Q, Lin H. Daily urban air quality index forecasting based on variational mode decomposition, sample entropy and LSTM neural network. *Sustainable Cities and Society* **50**, (2019).

8. Mnih V*, et al.* Playing Atari with Deep Reinforcement Learning. *Computer Science*, (2013).

9. Org Z. A Note on Measurement of Utility.

10. Mindrila D. Maximum Likelihood (ML) and Diagonally Weighted Least Squares (DWLS) Estimation Procedures: A Comparison of Estimation Bias with Ordinal and Multivariate Non-Normal Data. *International Journal of Digital Society* **1**, (2010).
